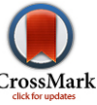

## Correction

# Correction: Tumor Suppressor p53 Functions as a Negative Regulator in IgE-Mediated Mast Cell Activation

## The PLOS ONE Staff

K.S. is supported in part by Grants-in Aids for Scientific Research from the Ministry of Education, Culture, Sports, Science, and Technology, the Japanese Government and by Global COE Program (Global Center for Education and Research in Immune System Regulation and Treatment), MEXT, Japan. This work was also supported by NIH grant number AI048034 to IMV. The funders had no role in study design, data collection and analysis, decision to publish, or preparation of the manuscript.

## Reference

1. Suzuki K, Murphy SH, Xia Y, Yokota M, Nakagomi D, et al. (2011) Tumor Suppressor p53 Functions as a Negative Regulator in IgE-Mediated Mast Cell Activation. PLoS ONE 6(9): e25412. doi:10.1371/journal.pone.0025412

---

**Citation:** The PLOS ONE Staff (2014) Correction: Tumor Suppressor p53 Functions as a Negative Regulator in IgE-Mediated Mast Cell Activation. PLoS ONE 9(9): e109474. doi:10.1371/journal.pone.0109474

**Published:** September 25, 2014

**Copyright:** © 2014 The PLOS ONE Staff. This is an open-access article distributed under the terms of the Creative Commons Attribution License, which permits unrestricted use, distribution, and reproduction in any medium, provided the original author and source are credited.
